# Supplementary material
Source: Research Square preprint supplement (doi:10.21203/rs.3.rs-9365545/v1)
Supplement: Supplementary file 2 [file 8a3a64c8fa82c3a626c7ec0e.docx]

## **Supplementary methods**

### Sample collection, cell isolation and scRNA sequencing

Lung tumor tissues, non-tumor adjacent lung tissues (NATs), and peripheral blood mononuclear cells from patients with LC were obtained with ethical approval (K2022179) from The Fourth Affiliated Hospital of Zhejiang University School of Medicine and The Second Affiliated Hospital Zhejiang University School of Medicine. Inclusion criteria: (1) Individuals who have undergone bronchoscopic or lung puncture biopsy or surgical tumor resection; (2) Pathologically confirmed diagnosis of non-small cell lung cancer; (3) No history of other malignant tumors; (4) Complete medical records. Exclusion criteria: (1) Individuals who have received neoadjuvant therapy before surgery; (2) Those with insufficient or poor-quality tumor specimens; (3) Individuals without a histopathological diagnosis or with mixed histological types; (4) Individuals lost to follow-up after surgery or puncture. COPD was diagnosed based on an FEV1/FVC ratio below 0.7, with severity graded according to the global initiative for chronic obstructive lung disease guidelines. The clinical and pathological characteristics of the patients are listed in Table S1.

Fresh tissue samples were promptly transported to the Singleron laboratory.Lung tissues were processed by washing with Hanks Balanced Salt Solution (HBSS) and sectioning using the Singleron PythoNTM Automated Tissue Dissociator (Singleron Biotechnologies).The digested samples were filtered through 40-micron sterile strainers and centrifuged at 800×g for 5 minutes.

Collect 2-4ml of peripheral blood in an EDTA tube and store at 2-8℃ or transport under refrigeration to the laboratory.Place 10mL of Ficoll-Paque Plus (Cytiva, equilibrated to room temperature) in a 50mL centrifuge tube, and add 2mL of blood to PBS (BasaI Media) to dilute to 10mL.Slowly and evenly layer the diluted blood along the tube wall onto the upper layer of the Ficoll-Paque Plus, with an acceleration speed of 5, deceleration speed of 0, at a temperature of 20℃, and centrifuge at 1000 ×g for 40 minutes.Collect the white membrane layer, add PBS to a final volume of 12mL, and centrifuge at 450×g for 10 minutes.Discard the supernatant, and resuspend the cell pellet in 1mL of PBS.

The pellets were resuspended in 1 ml of phosphate-buffered saline (PBS), followed by the addition of 2 ml of red blood cell lysis buffer (Singleron) at 4°C for 2 minutes to eliminate red blood cells.The tumor cell solution was centrifuged at 300×g for 5 minutes, followed by resuspension in PBS.The samples were stained with trypan blue (Sigma, United States) to evaluate cell viability.

Single-cell suspensions were prepared at a concentration of 1 × 10^5 cells/mL in PBS (HyClone, Shanghai, China) and loaded onto microfluidic devices. scRNA-seq libraries were constructed using the Singleron GEXSCOPE® protocol with the GEXSCOPE® Single-Cell RNA Library Kit and the Singleron Matrix® Automated single-cell processing system (Singleron Biotechnologies).Libraries were diluted to 4 ng/µL and pooled for sequencing.The pools underwent sequencing using the Illumina NovaSeq 6000 platform, generating 150 bp paired-end reads.

## scRNA-Seq data processing, quality control, and batch effect adjustment

We follow the best practices for single-cell analysis by Lukas et al1 to perform the quality control (QC) and preprocessing. QC contains filtering low quality reads, correction of ambient RNA and doublet detection. For filtering reads, median absolute deviations (MAD) is used to determine the outliner in the QC metrics given by Scanpy2. MAD is defined as
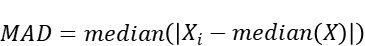
, where X is the value of QC metrics. Four QC covariates are considered under the process, including the log-transformed number of genes with positive counts, log-transformed total number of counts for a cell, proportion of total counts for a cell which are top 20 genes expressed and proportion of total counts for a cell which are mitochondrial. For first three metrics, 5 MAD is set to threshold, while for the last one 3 MAD. Additionally, cells with a percentage of mitochondrial counts exceeding 8% are filtered out. For correction of ambient RNA, SoupX3 is used to estimate the ambient mRNA expression profile from empty droplets. And scDblFinder R package4 is applied for doublet scoring. The doublet information is remained in the following analysis, while for some specific clusters with high doublet score will be filtered out. Harmony5 is used to do the batch effect adjustment in the principal component analysis (PCA) embedding.

## Dimensional reduction and clustering

PCA is performed on the normalized and log-transformed gene expression counts matrix to reduce dimensionality and visualize inter-sample relationships. Prior to PCA, batch effect correction is applied using Harmony5 to integrate batches and account for technical noise. The Harmony adjustment is done on the top 50 principal components, which explain the majority of variance in the dataset based on a scree plot analysis.

The batch-corrected PCA embedding is utilized to determine the 15 nearest neighbors for each cell based on Cosine distance in the principal component space. This neighbor graph forms the input for uniform manifold approximation and projection (UMAP), a nonlinear dimensionality reduction technique to visualize high-dimensional single-cell data. UMAP is run with a minimum distance of 0.5 to avoid visual overcrowding.

Finally, the Leiden community detection algorithm6 is applied on the nearest neighbors graph for unbiased, graph-based clustering. Leiden clustering resolution parameter is set after manual tuning to detect granular subpopulations while avoiding over-clustering.

## Identification of signature genes and differential gene expression (DEG) analysis

Differentially expressed genes (DEGs) between clusters are identified using the t-test implemented in Scanpy2. Prior to DEG testing, gene expression counts are normalized using a normalize counts per cell and log-transformation. DEGs are called at a 5% FDR significance level. Additionally, we apply log2(fold change) and fraction of expressing cells thresholds to filter for cluster-specific signature genes. The fraction of expressing cells is calculated as the percentage of cells in a cluster with non-zero expression.

Signature gene identification is performed iteratively for each cluster, comparing the current cluster against aggregates of all remaining cells. The final signature gene lists per cluster are manually inspected to verify specificity.

## Cell type determination

Initial cell type predictions are generated by mapping clusters to the Human Leukocyte Cell Atlas (HLCA) reference7 using the scvi-tools package8. This provides coarse-grained 5-level annotations for major immune categories.

For finer T cell subtyping, we leverage transfer learning with scANVI9, an autoencoder-based harmonization model. The scANVI model is pre-trained on the published Pancan T cell atlas resource10 containingannotated T cell subsets across cancer types. Our clusters are projected into the Pancan T cell latent space and labeled based on the closest pre-defined cell states.

In parallel, we interpret clusters manually based on known marker genes and their expected functions. If the computational predictions and manual labels conflict, the computational labels are overwritten based on biologist domain expertise.

The outputs of HLCA mapping, scANVI modeling and manual annotation are integrated into a final, consolidated cell type assignment for each cluster. Ambiguous or intermediate states are labeled as “Unknown”.

## Inference of CNV from scRNA-seq data

To distinguish putative malignant cells from non-malignant cells, we infer copy number variation (CNV) from perturbations in chromosomal gene expression patterns following the procedure of Ding et al.11.

First, we supplement the original tumor samples with additional normal lung cells derived from healthy donors. The proportion of tumor cells is adjusted to below 20% of all cells. This helps minimize false positive CNV calls. Genes expressed in less than 10 cells or with mean log2 expression < 0.1 are filtered out as uninformative for CNV detection. The expression of remaining genes is Z-score normalized from -3 to 3. Genes are ordered by chromosomal position. A moving average window of 100 genes is applied across chromosomes to smooth the signal, followed by mean-centering each gene’s Z-scores. This results in CNV estimates for each gene in each cell.

We summarize the CNV map into two metrics: 1) Mean squares (MS) of estimates across chromosome windows, indicating large deviations and 2) Pearson correlation to the average CNV signal from the top 5% highest MS cells, capturing similarity to highly aberrant cells. Finally, cells with MS > 0.02 or correlation > 0.2 are classified as CNV-aneuploid and putative malignancies for further analysis.

## Pathway analysis

We perform gene set enrichment analysis to identify biological pathways and processes associated with cluster-specific expression signatures. Two complementary methods are utilized: 1. Gene Set Enrichment Analysis (GSEA)12 : Gene-level statistics from the differential expression results are input to the GSEA algorithm. Enrichment is detected for a priori defined gene sets from the Enrichr database13, using a weighted Kolmogorov-Smirnov test. Significance is estimated after 1000 permutations of gene set membership. 2. Enrichr overrepresentation analysis13: The list of DEGs (adjusted p < 0.05) between a cluster and all other cells is analyzed. Enrichr computes overlaps with canonical pathway gene sets and estimates significance by a Fisher’s exact test.

For both methods, we focus our interpretation on Gene Ontology terms related to Biological Process, Reactome pathways, and KEGG pathways. Results are filtered to enriched terms with an adjusted p < 0.05 after Benjamini-Hochberg multiple hypothesis correction. By combining a ranked-based (GSEA) and overlap-based approach (Enrichr), we robustly determine pathways and processes linked to each cluster’s transcriptional state. The workflows are implemented in the Python package GSEApy14.

## Cell-cell interactions analysis

To predict signaling interactions between cell subsets, we apply CellChat15, a computational tool that infers ligand-receptor mediated communication from scRNA-seq data.

CellChat takes our normalized gene expression matrix as input. It pre-defines ligand and receptor gene pairs based on prior knowledge from public databases. Statistically significant co-expression relationships are determined by testing conditional dependence between ligand-encoding and receptor-encoding cells.

We run CellChat independently for each condition to comprehensively predict both intra- and inter-cluster communication. The outputs allow us to interpret signaling-mediated crosstalk underlying the observed transcriptional states.

## Definition of functional scores

We quantify the activity of gene sets (pathways, signatures, etc.) in each cell by calculating functional scores based on the approach of Satija et al 16.

For a gene set G:

1. Split all genes into 20 bins by their average expression level across all cells;
2. For each bin, randomly sample the same number of genes as in G to construct a reference group R;
3. The functional score is then defined as: score(G) = mean (EG) - mean (ER), where EG is the mean expression of genes in gene set G, and ER is defined similarly.

By comparing the gene set mean to a within-bin reference, this score estimates pathway activity independent of expression distribution biases. Scores are z-normalized across cells to enable comparative analysis. This approach allows quantitative activity measurements for any custom gene set while controlling for confounders like abundance and detection rate. We utilize the scores to test for enrichment of specific biological functions in each cell subpopulation. All signatures were got from previous studies (Table S2-4).

# Tissue/condition enrichment analysis

To determine if specific cell populations are enriched or depleted across tissues, conditions, or other relevant experimental groups, we calculate the ratio of observed to expected cells (Ro/e):


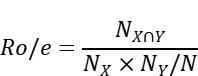


Where:
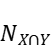
 is Number of cells belonging to both Cluster X and Group Y (e.g. tissue, condition);
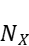
 is Total cells in Cluster X;
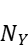
 is Total cells in Group Y; N is Total number of cells.

The numerator counts the intersection of cells shared between Cluster X and Group Y. The denominator gives the overlap expected under the null hypothesis of independence between X and Y. Values of Ro/e > 1 indicate over-representation and enrichment, whereas Ro/e < 1 indicates under-representation and depletion. We apply this metric universally to test for enrichments between cell clusters and any relevant groups in our metadata, including tissue source, COPD or nor and etc.

# Correlations between proportion of cell types and clinical features

To investigate links between immunophenotype and disease severity, we examine the correlation between relative cell type abundance and two key clinical measures of lung function: 1. FEV1%: Forced expiratory volume in 1 second as percentage of predicted value; 2. FEV1/FVC ratio: FEV1 divided by forced vital capacity. Lower values indicate worse pulmonary obstruction and function.

Since cell type composition is estimated as a proportion between 0-1, the raw fractions exhibit right-skewed distributions unsuitable for correlation analysis. We apply a transformation:
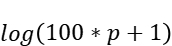
, where p is the fraction of cells belonging to a given cell type. Adding 1 and log-scaling controls for extreme proportional values while maintaining relative differences.

Transformed cell type proportions are correlated against FEV1% and FEV1/FVC measurements across patients using Pearson’s r. P-values are calculated to test if observed correlations differ significantly from the null hypothesis of no association. Significant anti-correlations to clinical variables suggest cell types potentially implicated in disease pathogenesis and severity. All correlation analyses are performed using SciPy stats functions in Python.

# Construction of cell developmental trajectory

To reconstruct developmental trajectories from cell state transitions, we utilize Monocle 17, an unsupervised machine learning technique for single-cell transcriptomic data. We apply the default parameters provided in the Monocle package and accompanying author’s tutorials to reconstruct cell state transition trajectories in an unbiased manner on previous constructed Umap embeddings. The end results enable interpretation of the ordering, branching, and molecular events underlying observed phenotypic changes in our cell subpopulations.

# Identification of tumor-specific and tumor-irrelevant T cells

To determine T cell clones responding specifically to cancer antigens versus bystander T cells, we leverage clonal T cell receptor (TCR) information and previous biomarkers identified by Chen et al 18.

First, we subset to exhausted CD8+ T cells previously labeled as sharing common TCR clonotypes based on single-cell V(D)J profiling. These cells represent an oligoclonal expansion from a common progenitor. We define tumor-specificity based on a functional score for exhaustion markers ENTPD1, ITGAE, MAF, ZBED2 and PDCD1, following the approach of Satija et al 16. Cells with a score > 0 are designated tumor-specific, while cells with score < 0 are classified as tumor-irrelevant.

This bifurcates T cell clones into subgroups exhibiting graded exhaustion and activation levels in response to cancer antigens. Differences in functional states are then compared between tumor-specific and irrelevant groups.

# SCENIC analysis

To infer gene regulatory networks and identify key transcription factors driving cell state differences, we apply the SCENIC workflow (Singular Cell Regulatory Network Inference and Clustering) 19. The analysis proceeds separately for tumor cells from COPD vs non-COPD patients:

1. Detect highly variable genes using a dispersion-based method analogous to Seurat v3 on the raw UMI counts
2. Build a coexpression network and determine transcription factor (TF) - target gene modules using GENIE3 algorithm
3. Assign TF motifs and target genes to regulons based on cisTarget HG38 reference database (https://resources.aertslab.org/cistarget/databases/)
4. Calculate AUC scores per cell to measure enrichment of regulon targets
5. Compare AUC-based activity scores between conditions with differential expression testing
6. Filter and visualize the differential regulatory network using NetworkX

This reconstructs dynamical GRNs and predicts key regulator TFs that distinguish COPD tumor cells. The pipeline follows guidelines from the official SCENIC protocol papers 20 using primarily default settings.

# LC patient survival analysis

To evaluate associations between gene signatures and patient overall survival, we perform Kaplan-Meier survival analyses using the Lifelines Python package. The survival time used in this study is progression free interval (PFI). Patients are first stratified into high and low groups based on expression of a gene set of interest (e.g. exhaustion markers). The optimal cutoff threshold maximizing differences between survival curves is determined by a searching strategy:

1. Iterate over all possible percentile cutoffs from 10-50% in increments of 10%
2. At each cutoff, split patients into high and low groups
3. Compute log-rank test between groups and record p-value
4. Select cutoff percentile that produced the lowest p-value

This data-driven approach prevents arbitrary binning and identifies the most prognostic split for a given gene signature. The Kaplan-Meier estimator is then used to plot survival curves for the optimal high and low groups. Lifelines calculate the hazard ratio between groups and p-value from the log-rank test comparing right-censored outcome data. P-values below 0.05 indicate the null hypothesis of no difference in survival is rejected at a 5% significance level. The hazard ratio reports the relative instantaneous risk of death for high vs low groups at any time point.

Spatial transcriptomics data generation

Tumor samples were obtained from 9 patients with lung cancer, consisting of 5 samples from patients with chronic obstructive pulmonary disease (COPD) and 4 samples from patients without COPD. The tissue slices were permeabilized for 24 minutes according to pre-established tissue optimization flow. Gene expression data for the tissue slices was obtained using the Visium Spatial platform (10× Genomics) with spatially barcoded mRNA-binding oligonucleotides following the standard protocol.

# Spatial transcriptomics deconvolution

Spatial gene expression profiles were generated using the 10x Genomics Visium platform, where each spot captures transcripts from multiple cells (typically ~10–30). To infer cell-type composition from these mixed signals, we performed cell-type deconvolution using cell2location.

cell2location leverages a single-cell RNA-seq reference to learn cell-type–specific expression signatures and then estimates the abundance of each cell type in every spot. Briefly, we used our annotated scRNA-seq dataset as the reference and trained the regression model to derive cell-type signatures. These signatures were then used in the cell2location spatial model to infer spot-wise cell-type abundances from the raw count matrix. Model outputs were normalized and visualized as spatial maps of inferred cell-type abundance across tissue sections, enabling cell-type–resolved interpretation of spatial transcriptomic data and integrated analyses with the scRNA-seq atlas.

# Colocalization of genes expression, cell fraction and signature score

To evaluate coordinated localization of genes, cell types, and signature scores, we apply both numerical correlation tests and spatial dependency assessments. This combined correlative and spatial enrichment approach quantifies both numerical and geographical associations to uncover trans interactions within the tissue microenvironment.

Pearson correlation coefficients and associated p-values are calculated between normalized scaled expression values, deconvolved cell fractions, and functional signature scores across spots. This measures the strength of linear relationships among omics variables.

Additionally, we utilize the Spanve method 21 to explicitly test for non-random spatial clustering between two variables. Spanve tabulates pseudo-counts of co-detection events between variables across proximal spatial sites. The empirical spatial enrichment patterns are compared to random permutation null models using Kullback–Leibler divergence, generating a localization landscape divergence p-value. Significance indicates coordinated localization unlikely to occur from independent spatial distributions.

# Statistical Analysis

The Mann-Whitney U test, a non-parametric two-sided method, is used for comparing functional scores between groups due to the non-normal distribution of scores. The Kruskal-Wallis H test, a non-parametric method, is used for comparing cell type proportions across multiple groups.

The Benjamini-Hochberg procedure is applied to control the false discovery rate at 5% during multiple hypothesis testing. Adjusted p-values below 0.05 are considered statistically significant.

TCR analysis

Scirpy8 facilitates quality control and processing of TCR sequencing data. TCR analysis is performed solely on cells classified as T cells to integrate these results with gene expression data. Cells containing both TCR α-chain (TRA) and TCR β-chain (TRB) are selected for further analysis.A clonotype is characterized by a distinct TRA(s)-TRB(s) pair. Cells sharing a clonotype present in at least two instances are deemed clonal, with their count reflecting the clonotype's clonality degree. A clonotype cluster is identified by the similarity of CDR3 amino acid sequences, using 'all' receptor arms, the 'alignment' metric, and the default cutoff. The CDR3 neighborhood map is depicted as a network, with each fully connected sub-network symbolizing a clonotype cluster and each dot indicating a distinct clonotype.

STARTRAC is employed to analyze various aspects of T cell dynamics based on paired transcriptome and TCR sequences as described in22. The indices STARTRAC-expa, STARTRAC-migr, and STARTRAC-tran were utilized to assess clonal expansion, tissue migration, and state transitions in T-cell clusters during TCR tracing, respectively. For an in-depth overview of the pipeline, visit the website at https://github.com/Japrin/STARTR.

## Flow cytometry analysis

The tumor was digested by collagenase. Erythrocytes were depleted using RBC lysis buffer, followed by a 10-minute cell blocking with FcR blocking reagent (BioLegend, 422302).Then the suspension was labeled with Live/Dead Fixable Viability Stain (BioLegend, 423102) to exclude dead cells.Cells were stained in PBS using fluorochrome-conjugated antibodies: APC/Fire™ 750 anti-human CD45 (BioLegend, 304062) and PerCP/Cyanine5.5 anti-human CD3 ( BioLegend, 317336).In the CD8+ T cell experiment, the following antibodies were used: Brilliant Violet 605™ anti-human CD8 (BioLegend, 344742), Brilliant Violet 785™ anti-human CD279 (PD-1) (BioLegend, 367432), and TIGIT (BioLegend, 372710).Flow cytometry was performed on a BD LSRFortessa, and collected data were analyzed using FlowJo software.

## Cell culture

A549 cells (ATCC CCL185) were maintained in RPMI 1640 medium supplemented with 10% FBS at 37°C in a 5% CO2 atmosphere.THP1 cells (ATCC TIB-202) were treated with 50 ng/ml phorbol 12-myristate 13-acetate (PMA) in RPMI 1640 medium without FBS for 24 hours. After this, the adherent THP1 cells were transferred to RPMI 1640 medium supplemented with FBS, with PMA removed, and cultured further.

## Isolation, activation, and culture of human peripheral CD8⁺ T cells

Peripheral blood mononuclear cells (PBMCs) were isolated from human peripheral blood by density gradient centrifugation using Ficoll-Paque PLUS (Solarbio, Cat# P4350) according to the manufacturer’s instructions. CD8⁺ T cells were subsequently purified from PBMCs using a Human CD8⁺ T Cell Negative Sorting Kit (MCE, Cat# HY-K0351), following the manufacturer’s protocol. Purified CD8⁺ T cells were cultured in RPMI 1640 medium supplemented with 10% fetal bovine serum (FBS) and activated using ImmunoCult™ Human CD3/CD28/CD2 T Cell Activator (STEMCELL Technologies, Cat# 10970). Recombinant human interleukin-2 (IL-2; Novoprotein, Cat# C013) was added to the culture medium to support T-cell proliferation and survival. Cells were maintained at 37°C in a humidified incubator with 5% CO₂ and collected at the indicated time points for downstream analyses.

## Production of CSE

The CSE was prepared following the previously reported method. A smoking apparatus was constructed by securing a modified straw to a syringe with a rubber band. The device was employed to draw smoke from a cigarette with the filter tip removed. The smoke was transferred into a 50 mL centrifuge tube containing 5 mL of RPMI 1640 medium, supplemented with 10% fetal bovine serum and 1% penicillin-streptomycin, and mixed thoroughly. After the process was repeated, the initial CSE was collected from the exhaust smoke of the cigarette, filtered, and sterilized. The absorbance of the filtered initial CSE, dissolved in RPMI 1640 medium, was measured at 320 nm using a microplate reader. The initial CSE was filtered and diluted to achieve an absorbance of 1.158, designated as 100% CSE.

In vitro cell stimulation assays

Macrophage stimulation: To assess the impact of TGFβ1 on macrophage phenotypes, macrophages were stimulated with recombinant human TGFβ1 in both dose- and time-dependent manners. For dose-dependent assays, macrophages were incubated with 0, 5, 10, 20, or 40 ng/mL of TGFβ1 for 24 hours. For time-dependent assays, cells were treated with 20 ng/mL of TGFβ1 and harvested at 0, 6, 12, 18, and 24 hours. The activation of TGFβ1 signaling and the expression levels of IL4I1 and LGALS9 (Gal-9) were subsequently monitored.

CD8+ T cell stimulation: To evaluate the effects of Gal-9 on T cell phenotypes, purified CD8+ T cells were exposed to recombinant human Gal-9 at concentrations of 0, 10, 20, or 40 ng/mL for 24 hours. Following stimulation, cells were harvested to measure the mRNA and protein expression levels of CXCL13 and CD82.

A549 cell stimulation: To mimic the inflammatory environment associated with cigarette smoking and bacterial infection, A549 cells were stimulated with cigarette smoke extract (CSE) or lipopolysaccharide (LPS). For dose-dependent experiments, A549 cells were treated with CSE at concentrations of 0%, 1%, 2%, 4%, and 8%, or with LPS at concentrations of 0, 1, 5, 10, and 20 ng/mL. For time-dependent experiments, cells were stimulated with CSE or LPS for 0, 6, 12, 18, and 24 hours. Expression levels of TGFβ1 were assessed following these treatments.

Western blot

Protein extracts were mixed with 5× SDS loading buffer (1 M Tris pH 7.8, 87% glycerol, 10% SDS, 0.1 g bromophenol blue) and incubated at 95°C for 5 minutes. The samples were loaded onto a gel with 5 μl of pre-stained PageRuler protein ladder (Fermentas) and electrophoresed at 110 V. The gels were transferred to a nitrocellulose membrane in a blotting chamber (Bio-Rad) using a transfer buffer (0.25 M Tris, 1.92 M glycine, and 1% SDS) for 45 minutes at 0.33 A after electrophoresis.Successful protein transfer was verified by Ponceau staining (Sigma).The membrane was then blocked with 5% low-fat milk (Merck) in PBS-Tween for 1 hour at room temperature. The membrane was washed thrice with PBS-Tween and incubated overnight at 4°C with the primary antibody in 5% low-fat milk. The membrane was subsequently washed thrice for 5 minutes each with PBS-Tween, then incubated with a 1:5000 dilution of peroxidase-conjugated secondary antibody in 5% low-fat milk for 1 hour at room temperature. Finally, the membrane was washed again three times with PBS-Tween and processed in a developing machine.The primary antibodies used included TGF beta 1 (Abmart, PA2154), IL4I1 (Abmart, PH0426), LGALS9 (Abmart, TA5290), pSMAD3 (Abmart, T55140S), SMAD3 (Abmart, T55013S), pSMAD2 (Abmart, T55857S), SMAD2 (Abmart, T55090), β-Actin (Abmart, P30002).The secondary antibodies used were α-rabbit (Sigma, A0545).

RNA extraction and quantitative real-time PCR

Total RNA was extracted from cells using the RNA Rapid Extraction Kit (manufacturer, catalog number) according to the manufacturer’s instructions. RNA concentration and purity were assessed using a NanoDrop spectrophotometer, and samples with acceptable purity (A260/A280 ratio between 1.8 and 2.0) were used for downstream analyses.Complementary DNA (cDNA) was synthesized from equal amounts of total RNA using a reverse transcription kit (manufacturer, catalog number). Quantitative real-time PCR (qRT–PCR) was performed using ChamQ Universal SYBR qPCR Master Mix (manufacturer, catalog number) on a real-time PCR detection system (instrument model). Each reaction was carried out in triplicate under standard cycling conditions recommended by the manufacturer.Relative gene expression levels were calculated using the 2^−ΔΔCt method, with GAPDH used as the internal control for normalization. The primers are shown in Table S5.

ELISA

All ELISA operations, using TGFβ1 Human Elisa Kit and LGSLS9 Human Elisa Kit, were performed in strict accordance with the instructions. Measure the OD value of each well at 450 nm wavelength with a microplate reader.

# External datasets

Normalized RNA-sequencing data for TCGA lung cancer patients is obtained from the xena Public Data Hubs ([https://pancanatlas.xenahubs.net](https://pancanatlas.xenahubs.net/)). Clinical variables including lung function measurements FEV1% and FEV1/FVC are retrieved from cBioPortal (<https://www.cbioportal.org/>)

## **References**

1. Liao, W.W., Asri, M., Ebler, J., Doerr, D., Haukness, M., Hickey, G., Lu, S., Lucas, J.K., Monlong, J., Abel, H.J., et al. (2023). A draft human pangenome reference. Nature *617*, 312-324. 10.1038/s41586-023-05896-x.

2. Wolf, F.A., Angerer, P., and Theis, F.J. (2018). SCANPY: large-scale single-cell gene expression data analysis. Genome Biol *19*, 15. 10.1186/s13059-017-1382-0.

3. Young, M.D., and Behjati, S. (2020). SoupX removes ambient RNA contamination from droplet-based single-cell RNA sequencing data. Gigascience *9*. 10.1093/gigascience/giaa151.

4. Germain, P.L., Lun, A., Garcia Meixide, C., Macnair, W., and Robinson, M.D. (2021). Doublet identification in single-cell sequencing data using scDblFinder. F1000Res *10*, 979. 10.12688/f1000research.73600.2.

5. Korsunsky, I., Millard, N., Fan, J., Slowikowski, K., Zhang, F., Wei, K., Baglaenko, Y., Brenner, M., Loh, P.R., and Raychaudhuri, S. (2019). Fast, sensitive and accurate integration of single-cell data with Harmony. Nat Methods *16*, 1289-1296. 10.1038/s41592-019-0619-0.

6. Traag, V.A., Waltman, L., and van Eck, N.J. (2019). From Louvain to Leiden: guaranteeing well-connected communities. Sci Rep *9*, 5233. 10.1038/s41598-019-41695-z.

7. Sikkema, L., Ramírez-Suástegui, C., Strobl, D.C., Gillett, T.E., Zappia, L., Madissoon, E., Markov, N.S., Zaragosi, L.E., Ji, Y., Ansari, M., et al. (2023). An integrated cell atlas of the lung in health and disease. Nat Med *29*, 1563-1577. 10.1038/s41591-023-02327-2.

8. Virshup, I., Bredikhin, D., Heumos, L., Palla, G., Sturm, G., Gayoso, A., Kats, I., Koutrouli, M., Berger, B., Pe'er, D., et al. (2023). The scverse project provides a computational ecosystem for single-cell omics data analysis. Nat Biotechnol *41*, 604-606. 10.1038/s41587-023-01733-8.

9. Xu, C., Lopez, R., Mehlman, E., Regier, J., Jordan, M.I., and Yosef, N. (2021). Probabilistic harmonization and annotation of single-cell transcriptomics data with deep generative models. Mol Syst Biol *17*, e9620. 10.15252/msb.20209620.

10. Zheng, L., Qin, S., Si, W., Wang, A., Xing, B., Gao, R., Ren, X., Wang, L., Wu, X., Zhang, J., et al. (2021). Pan-cancer single-cell landscape of tumor-infiltrating T cells. Science *374*, abe6474. 10.1126/science.abe6474.

11. Kim, N., Kim, H.K., Lee, K., Hong, Y., Cho, J.H., Choi, J.W., Lee, J.I., Suh, Y.L., Ku, B.M., Eum, H.H., et al. (2020). Single-cell RNA sequencing demonstrates the molecular and cellular reprogramming of metastatic lung adenocarcinoma. Nat Commun *11*, 2285. 10.1038/s41467-020-16164-1.

12. Subramanian, A., Tamayo, P., Mootha, V.K., Mukherjee, S., Ebert, B.L., Gillette, M.A., Paulovich, A., Pomeroy, S.L., Golub, T.R., Lander, E.S., and Mesirov, J.P. (2005). Gene set enrichment analysis: a knowledge-based approach for interpreting genome-wide expression profiles. Proc Natl Acad Sci U S A *102*, 15545-15550. 10.1073/pnas.0506580102.

13. Kuleshov, M.V., Jones, M.R., Rouillard, A.D., Fernandez, N.F., Duan, Q., Wang, Z., Koplev, S., Jenkins, S.L., Jagodnik, K.M., Lachmann, A., et al. (2016). Enrichr: a comprehensive gene set enrichment analysis web server 2016 update. Nucleic Acids Res *44*, W90-97. 10.1093/nar/gkw377.

14. Fang, Z., Liu, X., and Peltz, G. (2023). GSEApy: a comprehensive package for performing gene set enrichment analysis in Python. Bioinformatics *39*. 10.1093/bioinformatics/btac757.

15. Jin, S., Guerrero-Juarez, C.F., Zhang, L., Chang, I., Ramos, R., Kuan, C.H., Myung, P., Plikus, M.V., and Nie, Q. (2021). Inference and analysis of cell-cell communication using CellChat. Nat Commun *12*, 1088. 10.1038/s41467-021-21246-9.

16. Satija, R., Farrell, J.A., Gennert, D., Schier, A.F., and Regev, A. (2015). Spatial reconstruction of single-cell gene expression data. Nat Biotechnol *33*, 495-502. 10.1038/nbt.3192.

17. Van den Berge, K., Roux de Bézieux, H., Street, K., Saelens, W., Cannoodt, R., Saeys, Y., Dudoit, S., and Clement, L. (2020). Trajectory-based differential expression analysis for single-cell sequencing data. Nat Commun *11*, 1201. 10.1038/s41467-020-14766-3.

18. Chen, S.S., Barrientos, J.C., Ferrer, G., King-Richards, M., Chen, Y.J., Ravichandran, P., Ibrahim, M., Kieso, Y., Waters, S., Kutok, J.L., et al. (2023). Duvelisib Eliminates CLL B Cells, Impairs CLL-Supporting Cells, and Overcomes Ibrutinib Resistance in a Xenograft Model. Clin Cancer Res *29*, 1984-1995. 10.1158/1078-0432.Ccr-22-2386.

19. Aibar, S., González-Blas, C.B., Moerman, T., Huynh-Thu, V.A., Imrichova, H., Hulselmans, G., Rambow, F., Marine, J.C., Geurts, P., Aerts, J., et al. (2017). SCENIC: single-cell regulatory network inference and clustering. Nat Methods *14*, 1083-1086. 10.1038/nmeth.4463.

20. Van de Sande, B., Flerin, C., Davie, K., De Waegeneer, M., Hulselmans, G., Aibar, S., Seurinck, R., Saelens, W., Cannoodt, R., Rouchon, Q., et al. (2020). A scalable SCENIC workflow for single-cell gene regulatory network analysis. Nat Protoc *15*, 2247-2276. 10.1038/s41596-020-0336-2.

21. Guoxin, C., Yichang, C., Shuqing, C., Xun, G., and Zhan, Z. (2023). Spanve: an Statistical Method to Detect Clustering-friendly Spatially Variable Genes in Large-scale Spatial Transcriptomics Data. bioRxiv, 2023.2002.2008.527623. 10.1101/2023.02.08.527623.

22. Zhang, L., Yu, X., Zheng, L., Zhang, Y., Li, Y., Fang, Q., Gao, R., Kang, B., Zhang, Q., Huang, J.Y., et al. (2018). Lineage tracking reveals dynamic relationships of T cells in colorectal cancer. Nature *564*, 268-272. 10.1038/s41586-018-0694-x.
