# Supplementary material
Source: Research Square preprint supplement (doi:10.21203/rs.3.rs-9365545/v1)
Supplement: Supplementary file 3 [file caa449ab4ed919cb6586685c.xlsx]

## Sheet: Sheet1
Table S1. Clinical characteristics of the subjects included in the study
Patient_id	Smoking history	Age	Sex	Tumor pathology	Tumor stage	FEV1/FVC	COPD group	FEV1%	COPD stage	Blood sample	Tumor sample	Non-tumor sample	Spatial transcriptomic
NAD1	N	65	F	adenocarcinoma	pT4N0M0 IIIA	79.5	non-COPD	99.1	Control	Y	Y	Y	Y
NAD2	N	59	F	adenocarcinoma	pT1bN0M0 IA2	81.34	non-COPD	117.7	Control	Y	Y	Y
NAD3	N	51	F	adenocarcinoma	pT3N2M1a IVA	81.48	non-COPD	106.5	Control	Y	Y	Y
NAD5	Y	54	M	adenocarcinoma	cT1cN2M0 IIIA	78.12	non-COPD	106.2	Control	Y	Y
NAD6	N	67	F	adenocarcinoma	cT3N0M0 IIB	87.41	non-COPD	87.7	Control	Y	Y
NSC1	Y	74	M	squamous carcinoma	pT2aN0M0 IB	71.15	non-COPD	86.7	Control	Y	Y	Y	Y
NSC2	Y	77	M	squamous carcinoma	pT2bN0M0 IIA	79.03	non-COPD	82.6	Control	Y	Y
NSC3	Y	84	M	squamous carcinoma	cT3NxMx	75.26	non-COPD	105.9	Control	Y	Y
NSC4	Y	73	M	squamous carcinoma	cT1cN3M0 IIIB	78.46	non-COPD	47.4	Control	Y	Y		Y
NSC5	Y	60	M	squamous carcinoma	pT3N0M0 IIB	78.65	non-COPD	99.1	Control		Y	Y
NSC6	Y	59	M	squamous carcinoma	T2bN3M0 IIIB	75.29	non-COPD	86.3	Control				Y
NSC7	Y	72	M	squamous carcinoma	cT4N2M0 IIIB	72.32	non-COPD	93.6	Control		Y
PAD1	Y	73	M	adenocarcinoma	pT1bN0M0 IA2	48.3	COPD	42	GOLD3	Y	Y
PAD2	N	80	M	adenocarcinoma	pT2aN2M1c IVB	50	COPD	52.4	GOLD2	Y	Y	Y	Y
PAD3	N	59	M	adenocarcinoma	pT3N0M0 IIB	51.5	COPD	56.2	GOLD2	Y	Y	Y	Y
PAD4	N	63	M	adenocarcinoma	pT1cN0M0 IA3	68.55	COPD	90.1	GOLD1	Y	Y	Y	Y
PAD5	N	62	F	adenocarcinoma	cT4N3M1c IVB	66.53	COPD	69	GOLD2	Y	Y	Y
PAD6	Y	60	M	adenocarcinoma	cT2bN0M0 IIA	53.19	COPD	57.5	GOLD2	Y	Y
PSC1	Y	68	M	squamous carcinoma	pT1cN0M0 IA3	54.19	COPD	62.54	GOLD2	Y	Y		Y
PSC2	Y	76	M	squamous carcinoma	cT2aN1M0 IIB	61.21	COPD	76.9	GOLD2		Y	Y
PSC3	N	67	M	squamous carcinoma	cT3N2M0 IIIB	47.4	COPD	36.2	GOLD3	Y	Y
PSC4	Y	76	M	squamous carcinoma	cT4N2Mx	66.12	COPD	49.7	GOLD3	Y	Y		Y
PSC5	Y	65	M	squamous carcinoma	cT4N2M0 IIIB	63.95	COPD	69.9	GOLD2	Y	Y
PSC6	Y	72	M	squamous carcinoma	pT1bN0Mx	40.93	COPD	49.9	GOLD3	Y	Y
PSC7	Y	75	M	squamous carcinoma	cT3N2M0 IIIB	40.05	COPD	52.3	GOLD2	Y	Y
PSC9	Y	62	M	squamous carcinoma	cT4N2M0 IIIB	67.21	COPD	93.5	GOLD1	Y	Y
PSC10	Y	70	M	squamous carcinoma	cT4N2Mx	68.85	COPD	84.7	GOLD1	Y	Y	Y
PSC11	Y	64	M	squamous carcinoma	cT2NxMx	31.72	COPD	25.5	GOLD4		Y
PSC12	Y	77	M	squamous carcinoma	cT4N2Mx	68.39	COPD	79.1	GOLD2		Y
PSC13	Y	70	M	squamous carcinoma	cT3N2M0 IIIB	56.68	COPD	80.9	GOLD1		Y
PSC14	Y	72	M	squamous carcinoma	pT2bN0M0 IIA	66.84	COPD	47.5	GOLD3		Y
Abbreviations: NAD - non-COPD and adenocarcinoma; NSC - non-COPD and squamous carcinoma; PAD - COPD and adenocarcinoma; PSC - COPD and squamous carcinoma.
