# Supplementary material
Source: Research Square preprint supplement (doi:10.21203/rs.3.rs-9365545/v1)
Supplement: Supplementary file 3 [file de35018d966459792e8d637d.docx]

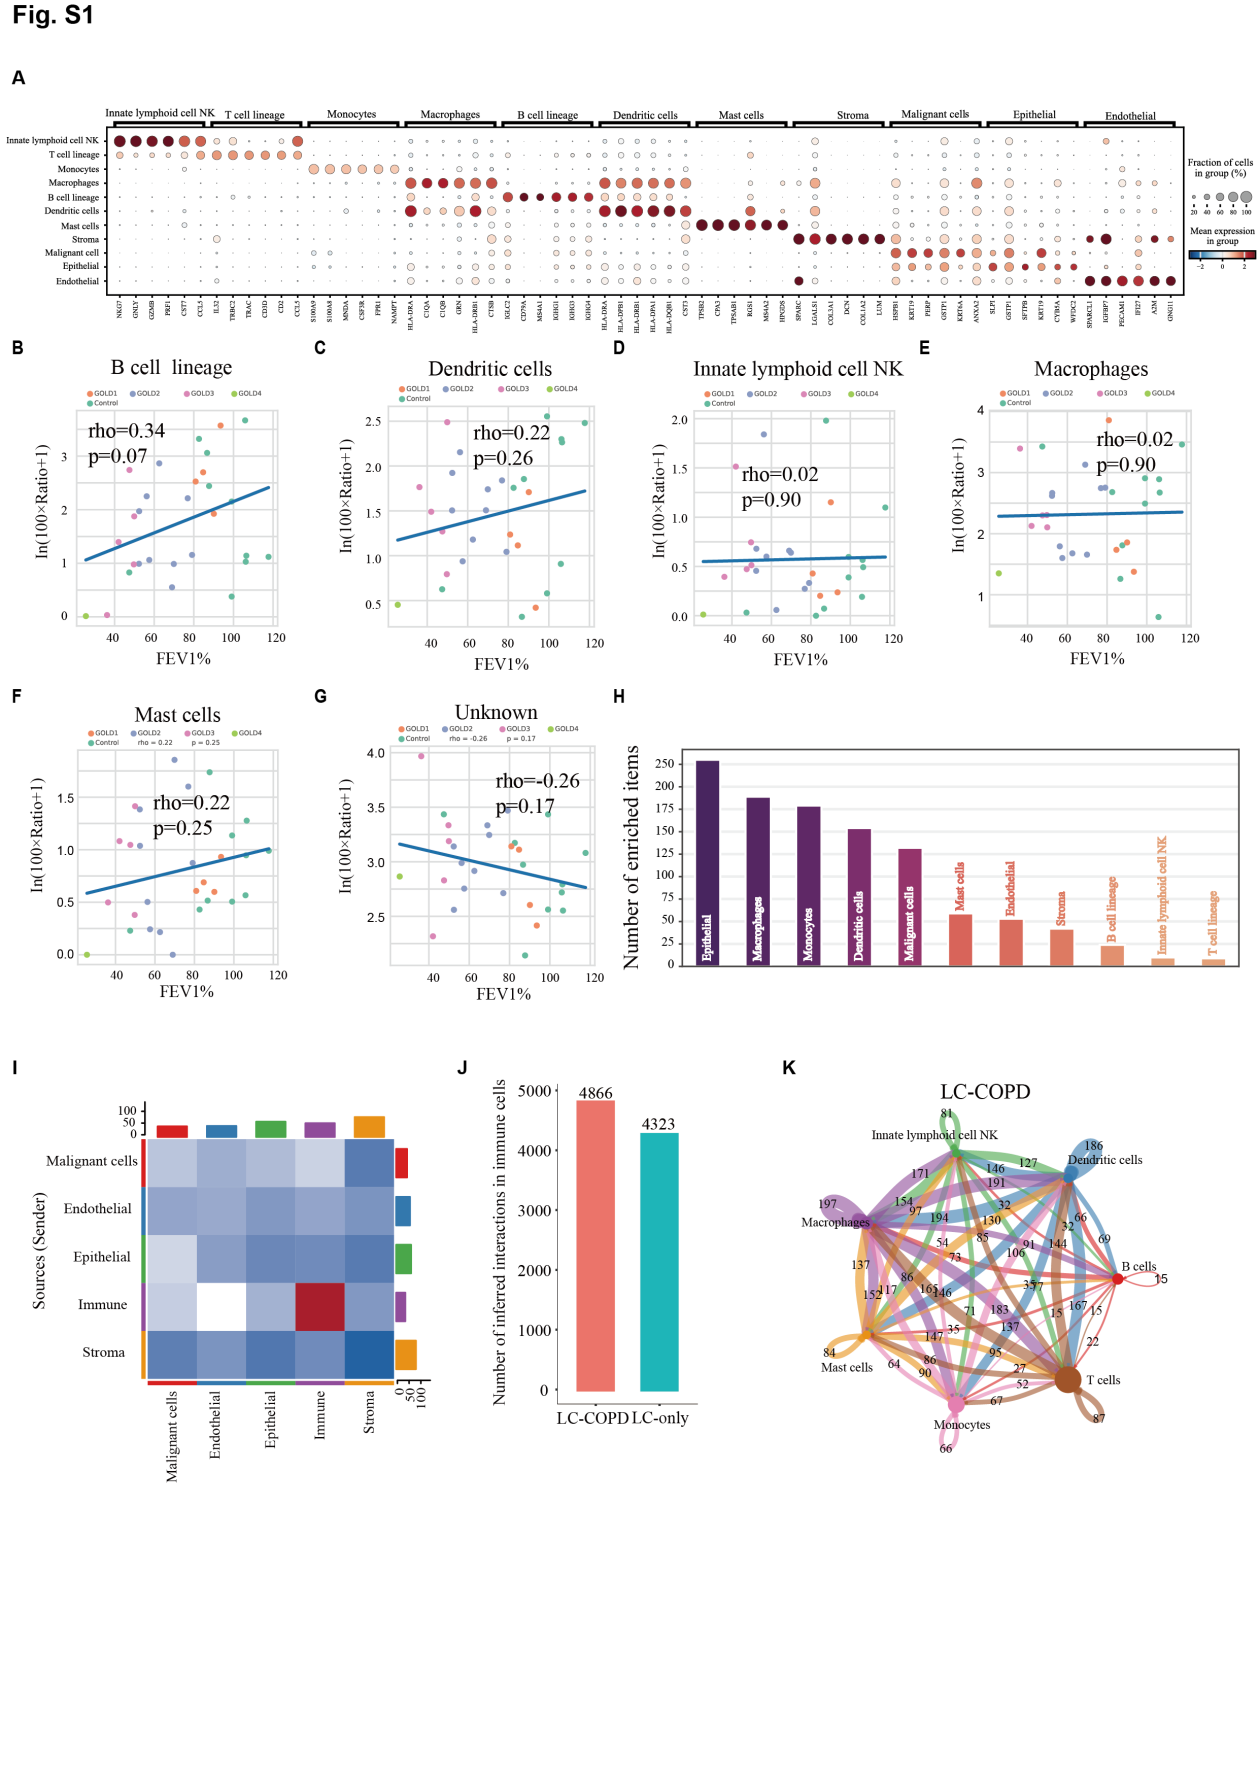


Figure S1. Characteristics and distribution of each subpopulation, related to Figure 1

(A) Bubble plot of mean expression of main marker genes in the indicated cell subsets.

(B-G) Correlation analysis of the cell fraction of immune cell subtypes with percentage forced expiratory volume in 1 s (FEV1%). Color code depicts the stratification of COPD patients according to the Global Initiative for Chronic Obstructive Lung Disease (GOLD) guidelines.

(H) Enrichment analysis of differentially expressed genes (DEGs) between NSCLC with and without COPD among immune cell subtypes.

(I) Differential number of possible interactions between any two cell populations. Red (positive values) and blue (negative values) represent higher predicted interactions in NSCLC with and without COPD, respectively.

(J) Total number of possible interactions among immune cells (macrophages, NK cells, dendritic cells, B cells, T cells, mast cells, and monocytes).

(K) Number of potential interactions among the five major cell types in tumors from LC-COPD.


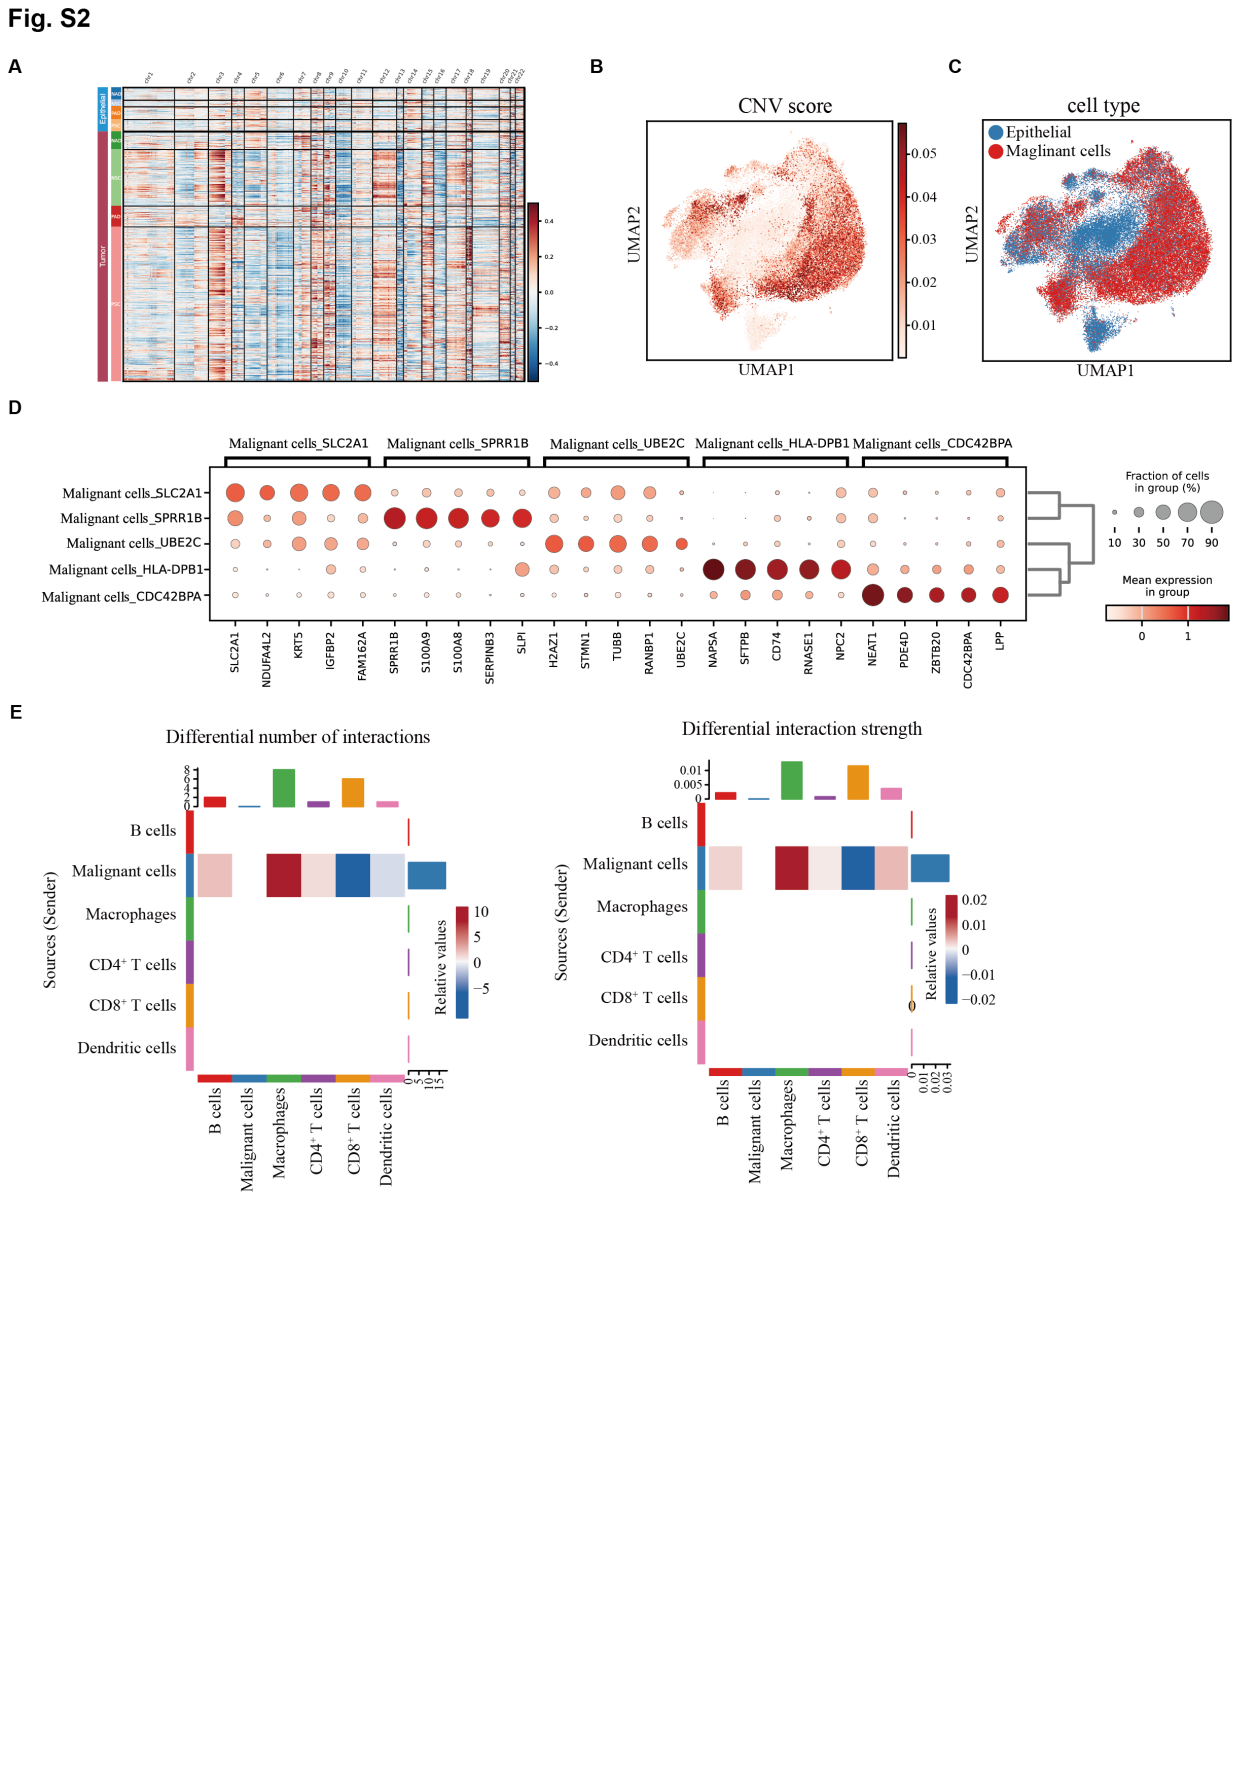


Figure S2. The identification of malignant cells, related to Figure 2

(A) Hierarchical heatmap showing large-scale CNVs of malignant cells and epithelial cells.

(B-C) UMAP plot showing the inferred CNV score and classification of malignant cells and epithelial cells.

(D) Bubble plot of mean expression of main marker genes in the malignant cell subsets.

(E) Differential number/strength of possible interactions between malignant cells and immune cells populations. Red (positive values) and blue (negative values) represent higher predicted interactions in NSCLC with and without COPD, respectively.


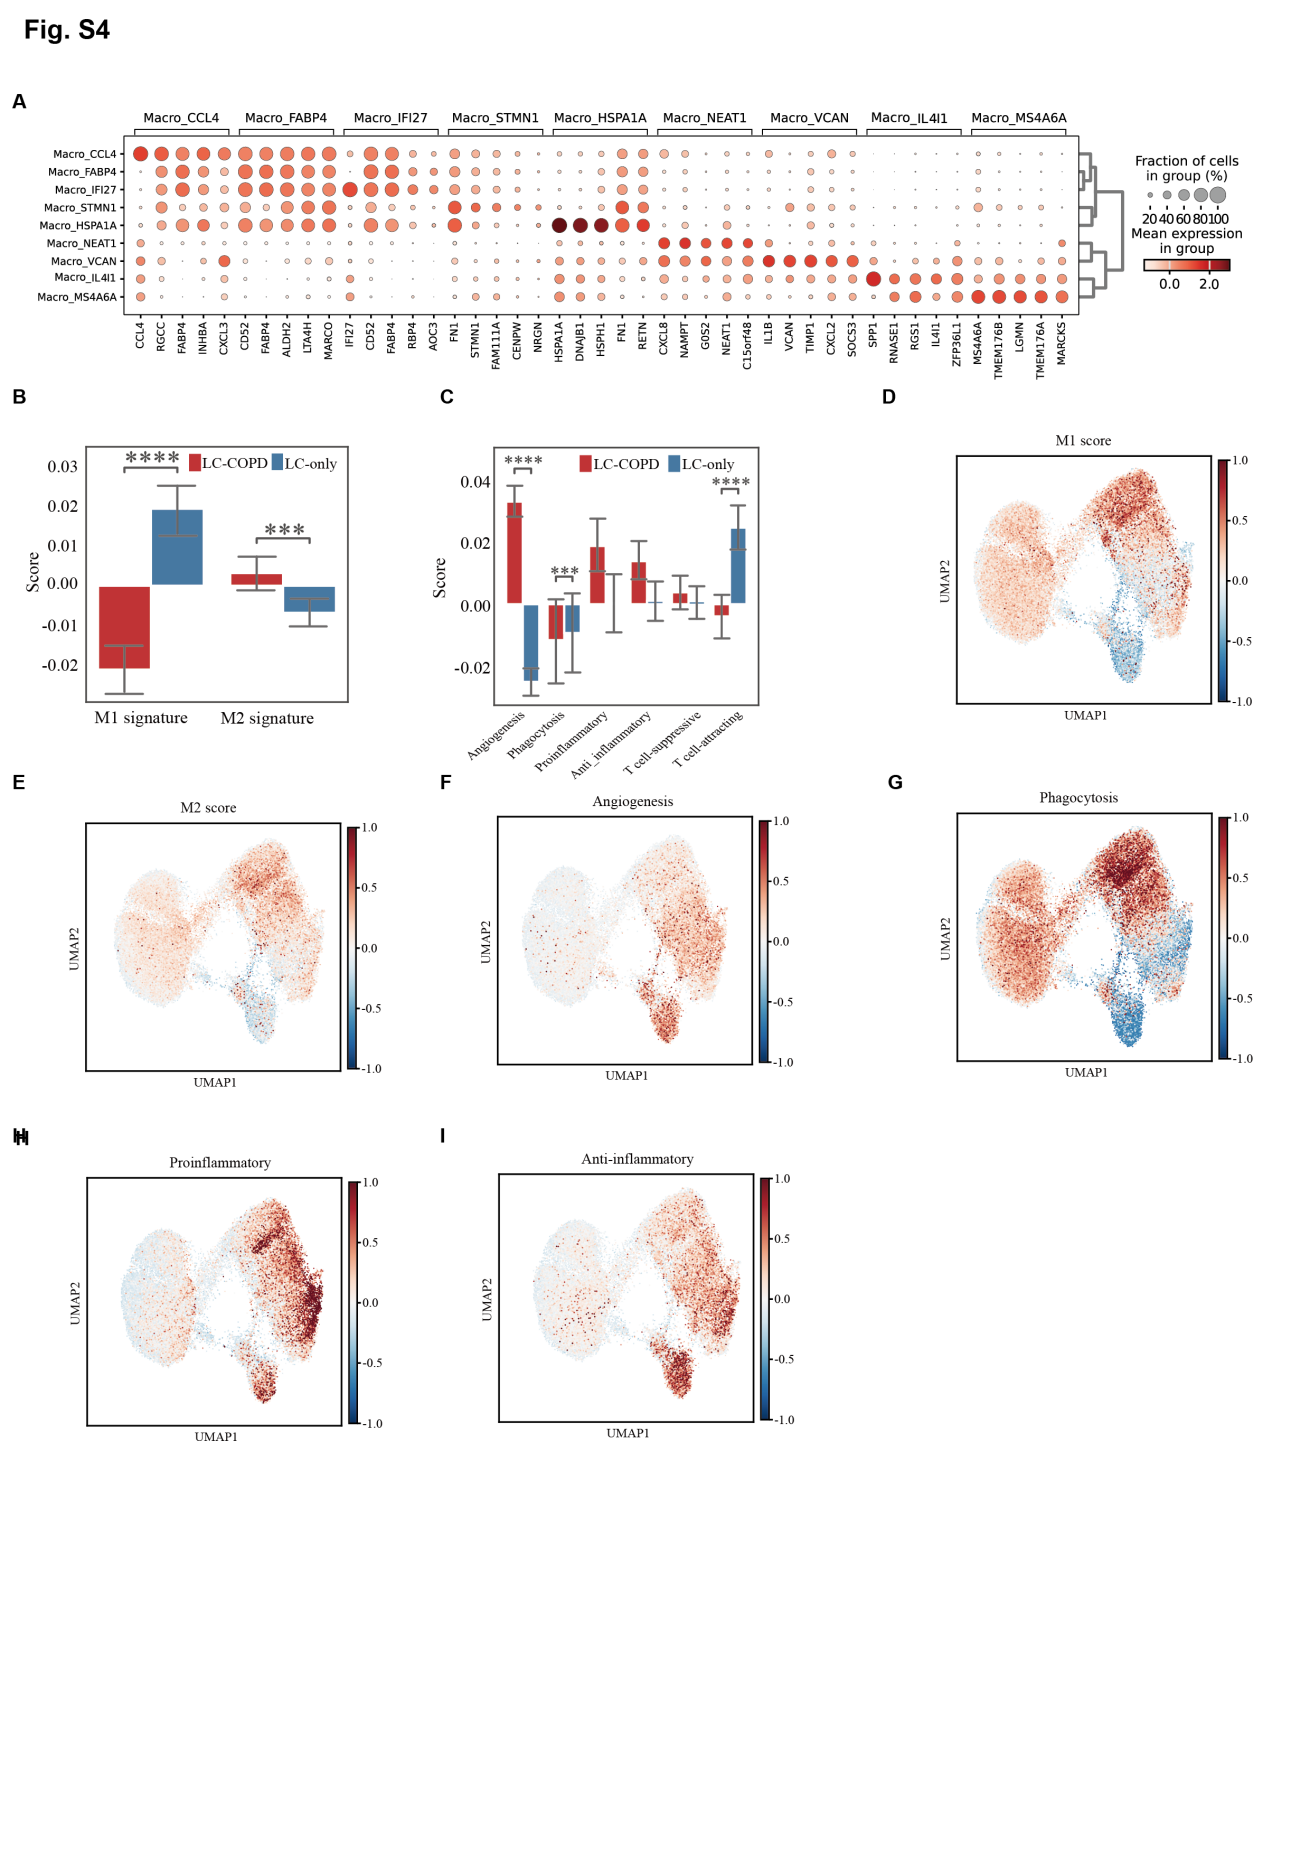


Figure S3 Characteristics of macrophage clusters, related to Figure 4.

(A) Bubble plot of mean expression of main marker genes in the macrophage subsets.

(B-C) Box plot of the expression scores of signatures of differentiation and functionality among macrophages in tumor samples.

(D-J) UMAP plot of the scores among macrophage clusters.

* p < 0.05, ** p < 0.01, *** p < 0.001, **** p < 0.0001.


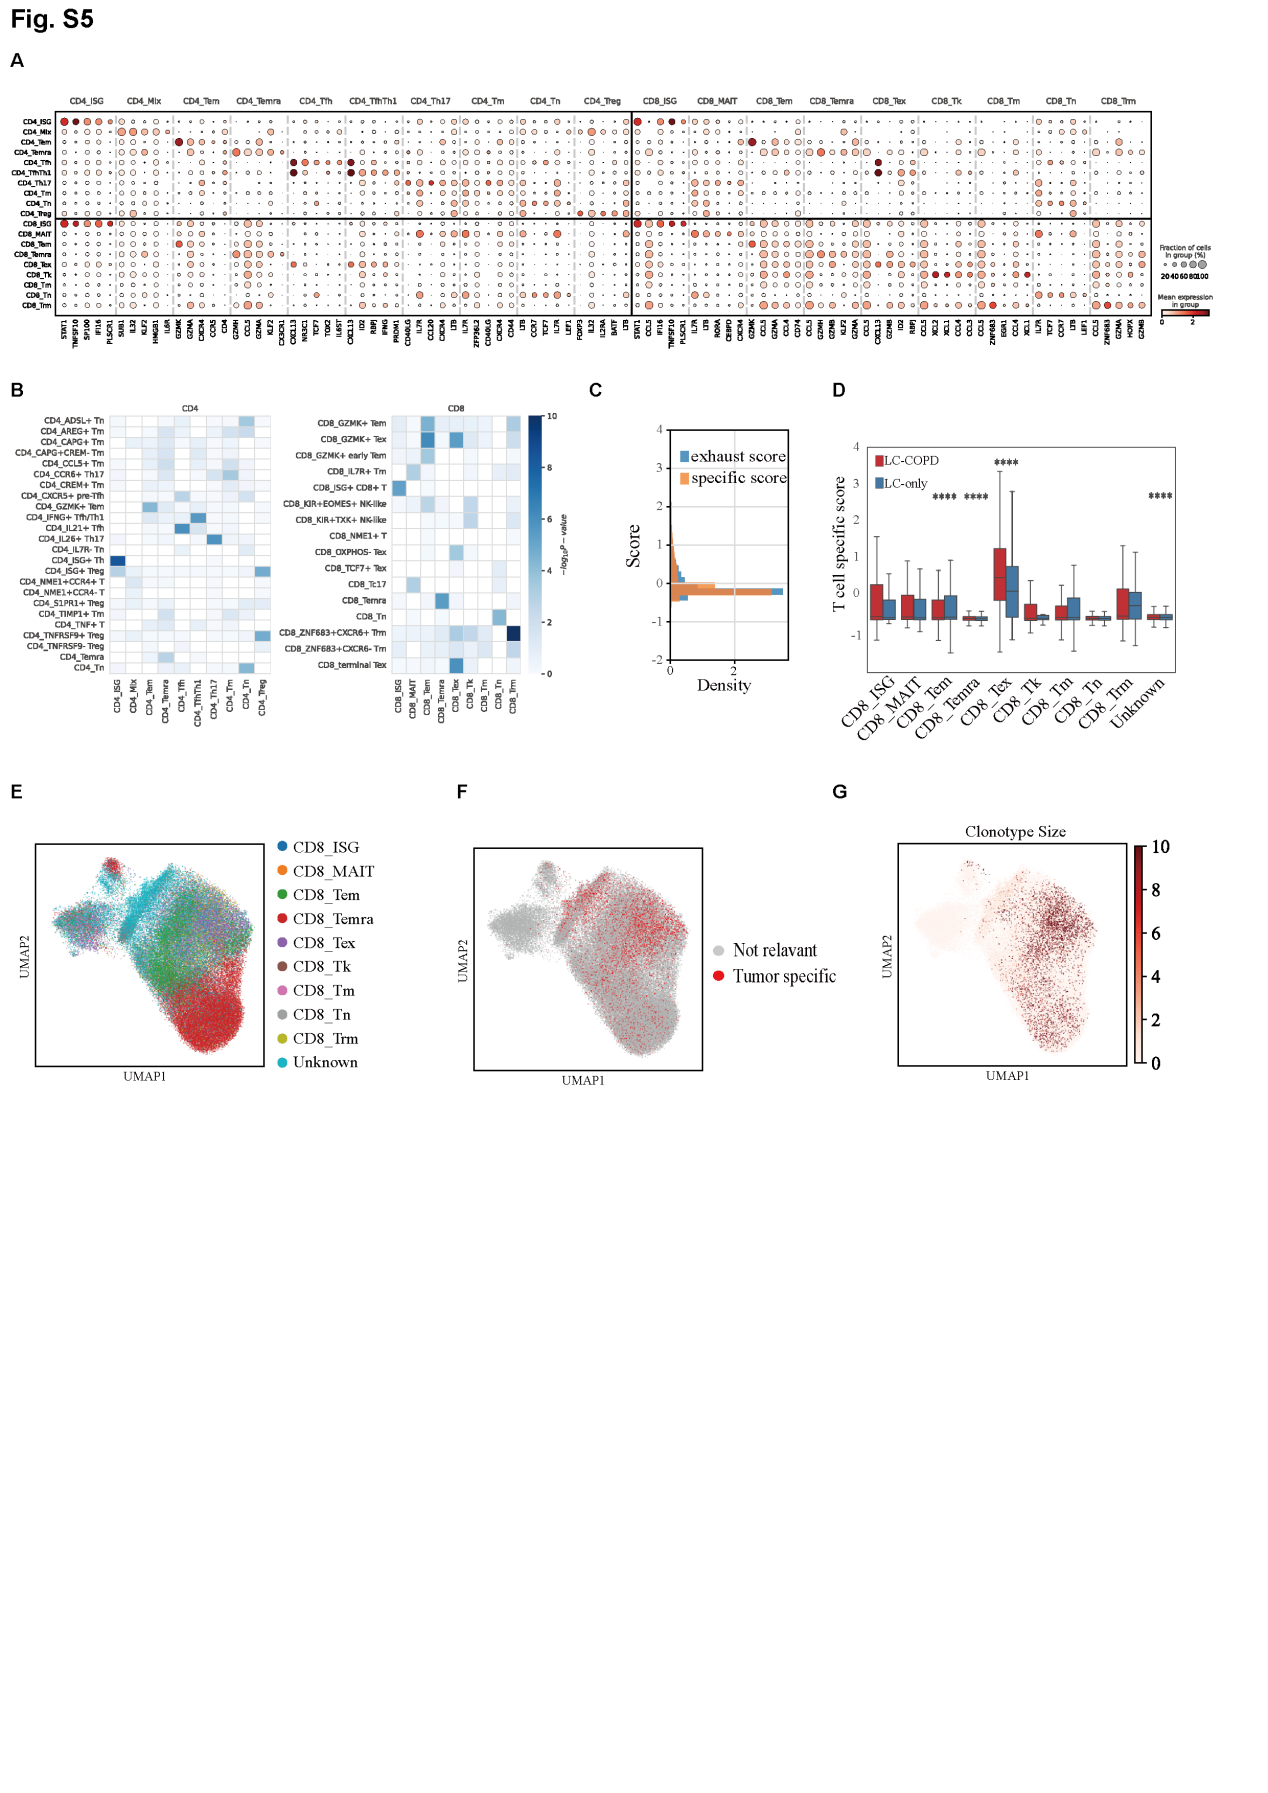


Figure S4 Annotation of T cell clusters and characterization of tumor-specific CD8+ T cell, related to Figure 5.

(A) Bubble plot of mean expression of main marker genes in the T cell subsets.

(B) Heatmap showing cluster annotation of CD4+T and CD8+T cells.

(C) Distribution of CD8+T cell exhaust scores and tumor-specific scores.

(D) Box plot of CD8+T cell tumor-specific scores in NSCLC-COPD and NSCLC-only.

(E) UMAP show the number of clonotypes and clonal cells in each CD8+ T-cell cluster.

(F-G) UMAP show the number of clonotypes and clonal cells in tumor-specific CD8+ T-cell cluster.

* p < 0.05, ** p < 0.01, *** p < 0.001, **** p < 0.0001.


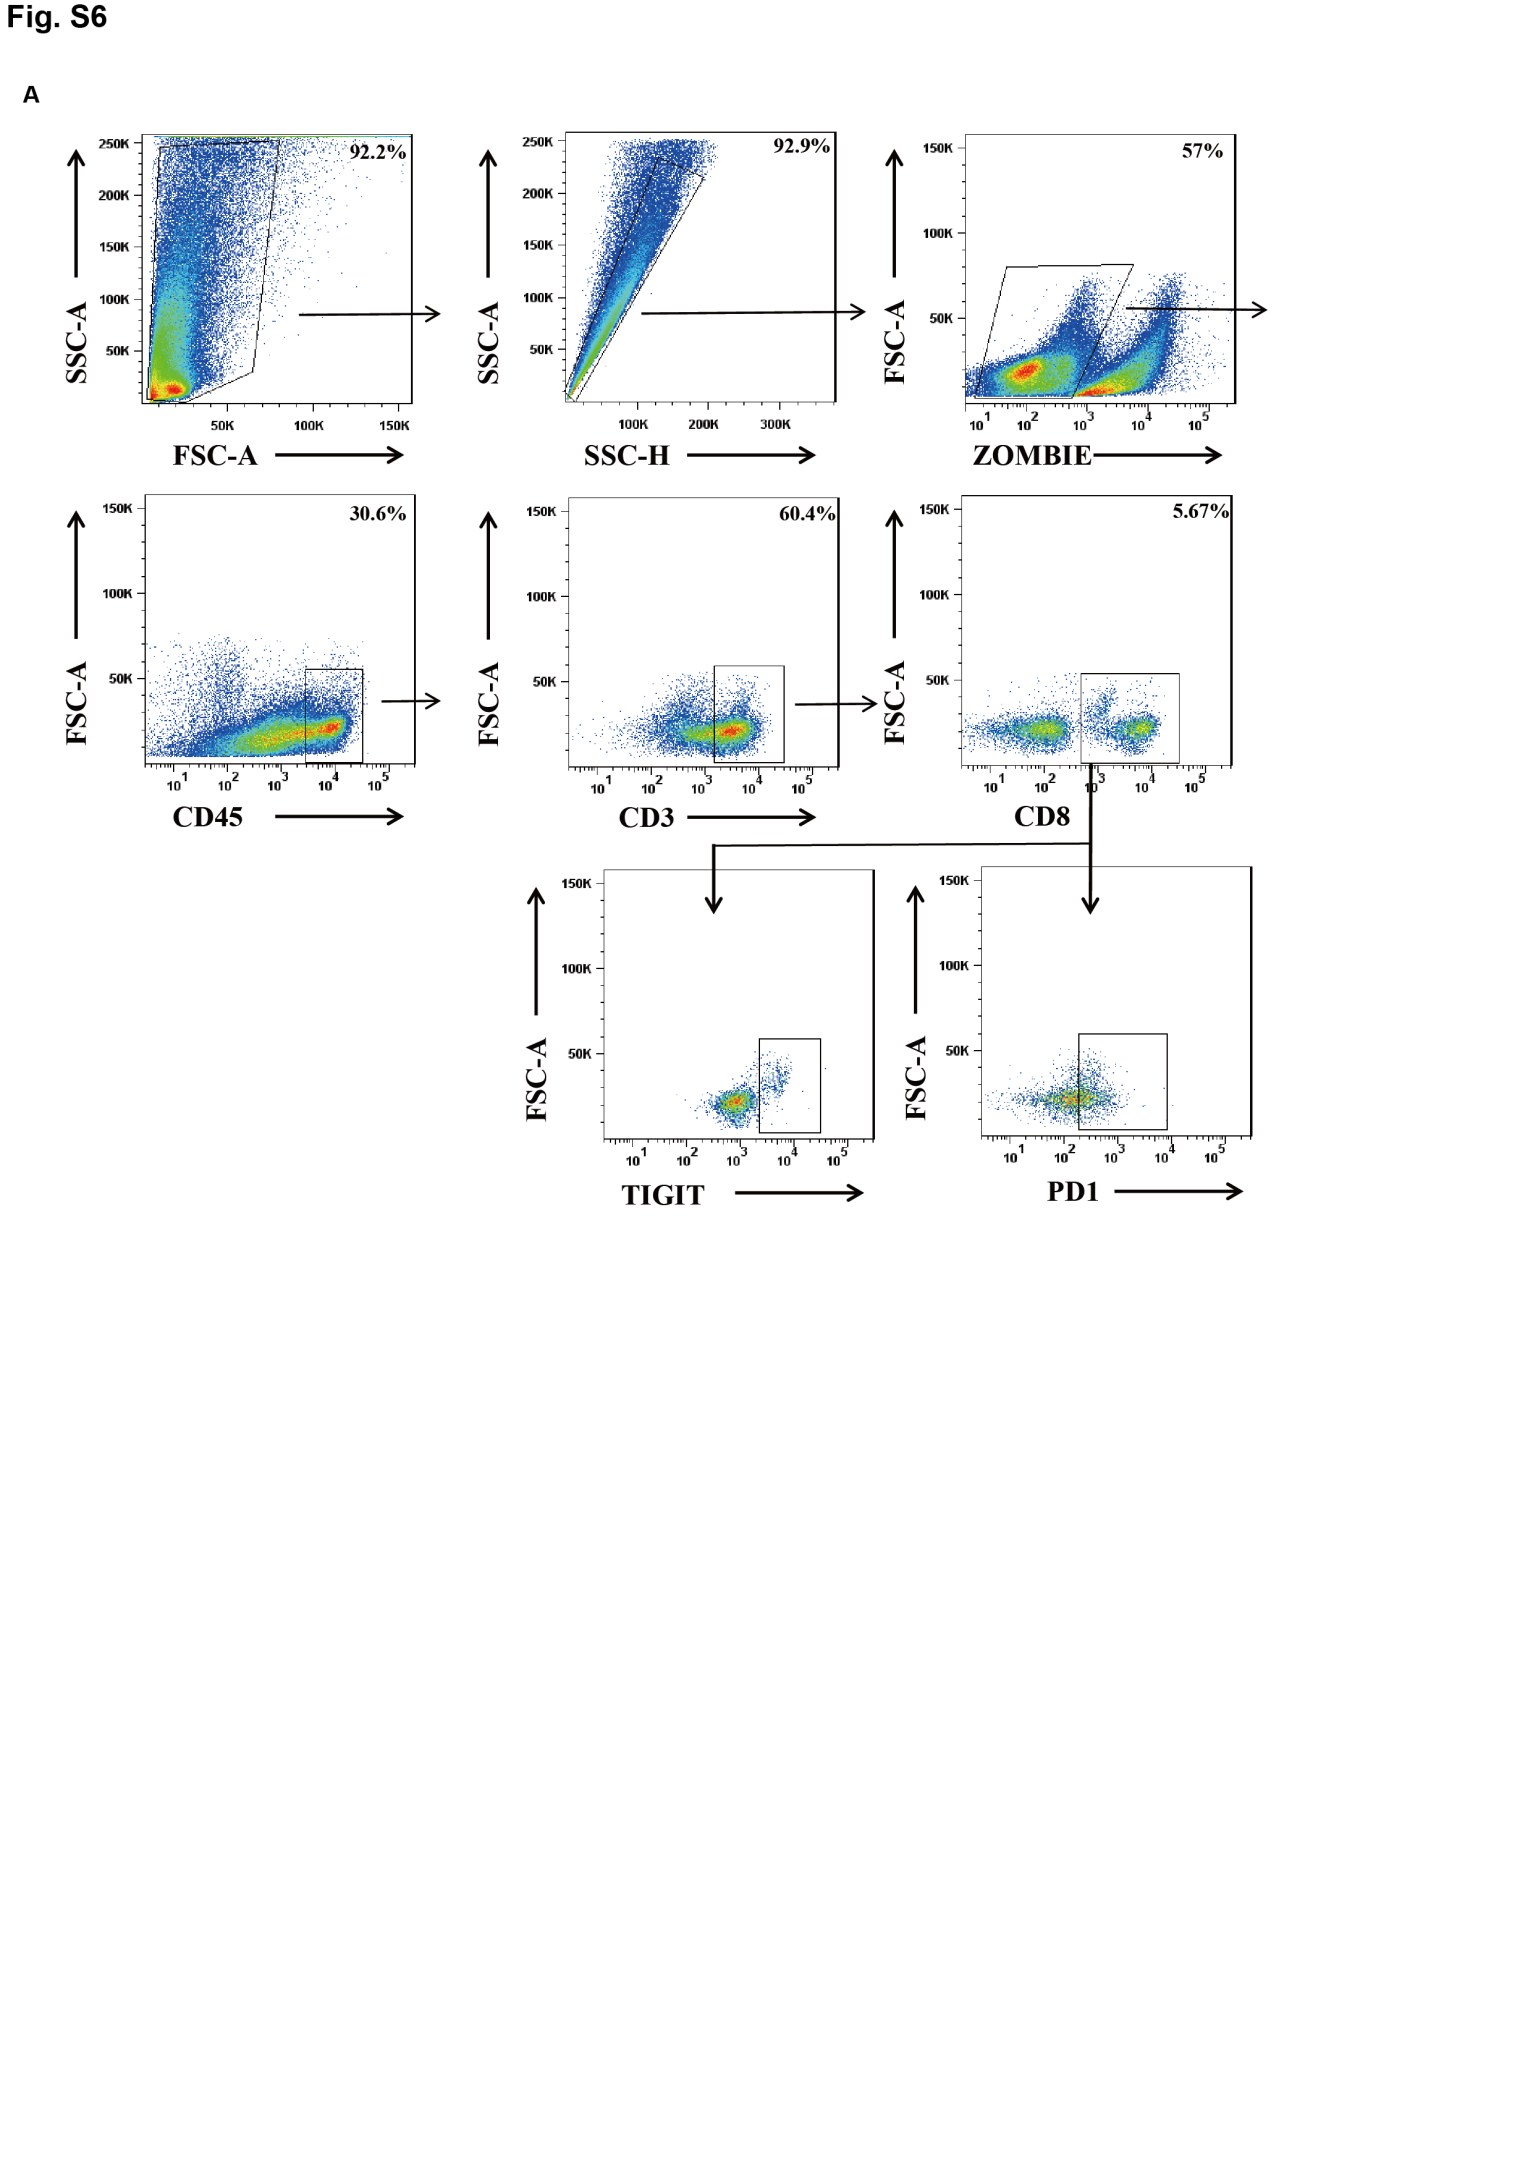


Figure S5 The gating strategy of CD8+ T cells in the flow cytometry experiments, related to Figure 5.


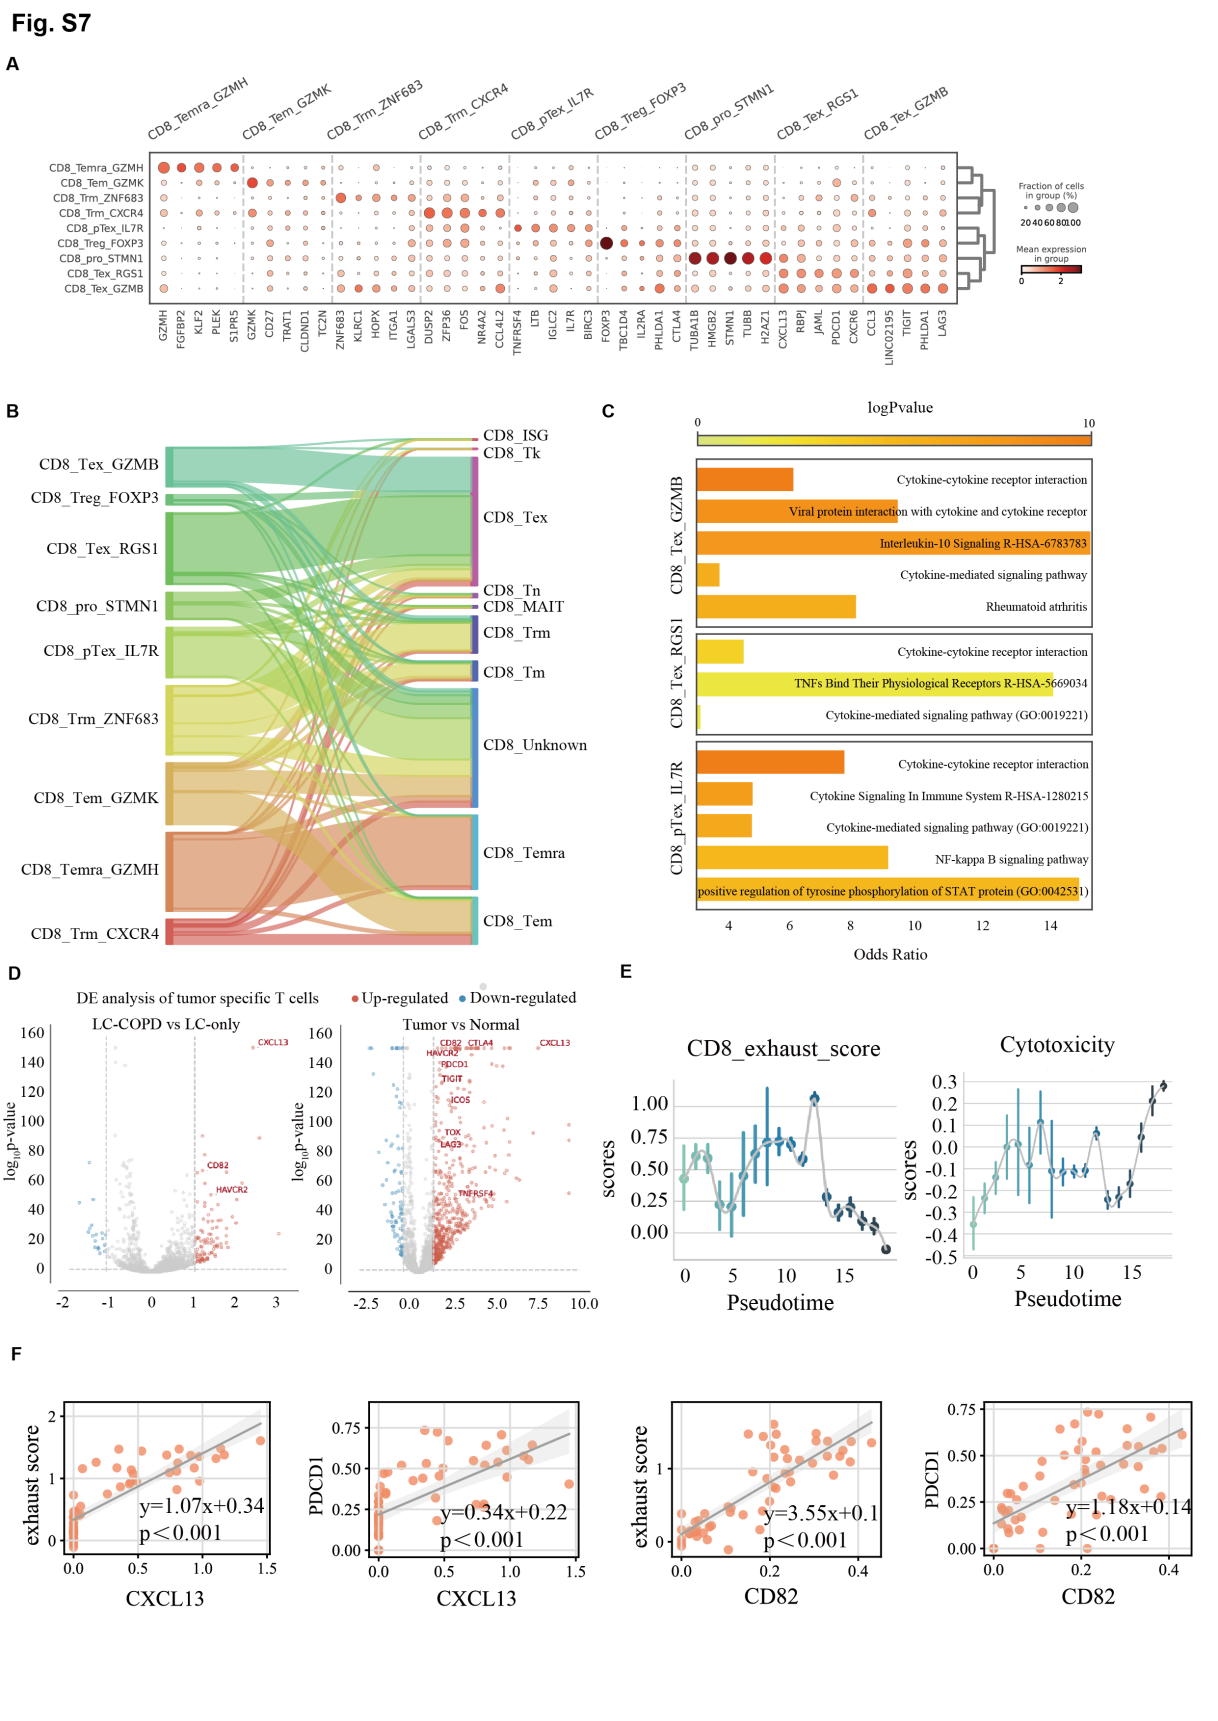


Figure S6 Annotation and characteristics of tumor-specific CD8+ T cell clusters, related to Figure 6.

(A) Bubble plot of mean expression of main marker genes in tumor-specific CD8+ T cell subsets.

(B) Alluvial plot showing the corresponding relation between functional annotations of tumor-specific CD8+ T cells and their general annotations in CD8+ T cells.

(C) Gene set enrichment analysis of exhaust cells’specific markers using the MSigDB, GO and KEGG database.

(D) Differentially expressed genes in tumor specific CD8+T cells in lung cancer with COPD versus lung cancer without COPD, tumor samples versus NAT samples.

(E) Pseudotime plot showing expression of CD8_exhaust signatures and cytotoxicity in tumor-specific CD8+ T cells over the trajectory.

(F) Correlation analysis of exhaust score and PDCD1 expression with CXCL13 and CD82 expression of tumor-specific CD8+ T cells.
