# Supplementary material
Source: Research Square preprint supplement (doi:10.21203/rs.3.rs-9365545/v1)
Supplement: Supplementary file 5 [file e89a1a707fddc335d3ede4bf.xlsx]

## Sheet: malignant cells
Table S2. Signature related gene sets used in malignant cells analysis.
Signature names	Genes	References
Proliferation	MCM5 PCNA TYMS FEN1 MCM2 MCM4 RRM1 UNG GINS2 MCM6 CDCA7 DTL PRIM1 UHRF1 CENPU HELLS RFC2 RPA2 NASP RAD51AP1 GMNN WDR76 SLBP CCNE2 UBR7 POLD3 MSH2 ATAD2 RAD51 RRM2 CDC45 CDC6 EXO1 TIPIN DSCC1 BLM CASP8AP2 USP1 CLSPN POLA1 CHAF1B BRIP1 E2F8 HMGB2 CDK1 NUSAP1 UBE2C BIRC5 TPX2 TOP2A NDC80 CKS2 NUF2 CKS1B MKI67 TMPO CENPF TACC3 PIMREG SMC4 CCNB2 CKAP2L CKAP2 AURKB BUB1 KIF11 ANP32E TUBB4B GTSE1 KIF20B…	Cell. 2021 Jan 21;184(2):404-421.e16.
Immune surveillance	HLA-A HLA-B HLA-C MICA MICB
Immune escape	CD47 ADAM10 HLA-G CD274 FASLG CCL5 TGFB1 IL10 PTGER4
Hypoxia	WSB1 JMJD6 XPNPEP1 RRAGD PPP1R3C MT1E TES ATF3 SERPINE1 GLRX UGP2 NOCT MXI1 DPYSL4 CCN5 PPARGC1A CCN2 CCN1 DTNA SIAH2 MIF PRKCA EXT1 FOSL2 SLC6A6 SULT2B1 BCAN LALBA CHST2 SDC2 HOXB9 CHST3 LXN NEDD4L PDGFB ENO1 ENO2 ENO3 RBPJ MT2A PLAC8 PRDX5 HMOX1 PDK1 PDK3 IER3 EDN2 JUN ANXA2 TPI1 DUSP1 AMPD3 CP VEGFA P4HA1 P4HA2 BHLHE40 CCNG2 PAM ALDOC ALDOB ALDOA GPI CITED2 BTG1 SDC3 SDC4 STC1 ADM STC2 VLDLR B…	MSigDB_Hallmark_2020
Glycolysis	SLC35A3 GLCE HOMER1 PC RRAGD PSMC4 CTH RBCK1 KIF20A POLR3K XYLT2 GLRX CLDN3 HS6ST2 CHST12 UGP2 MXI1 DPYSL4 PMM2 TALDO1 MIF COG2 PHKA2 ALG1 EXT1 EXT2 ALDH7A1 CHST1 SDC1 CHST2 SDC2 GNE CHST6 CHST4 TSTA3 PAXIP1 TXN ENO1 ENO2 ARPP19 STMN1 SOX9 PDK3 IER3 MIOX TPI1 AKR1A1 VEGFA P4HA1 ARTN P4HA2 TFF3 DEPDC1 PAM ALDOB ALDOA CITED2 SDC3 STC1 STC2 TGFA VLDLR LDHC LDHA LHPP QSOX1 EGLN3 MDH2 PGAM1 PGAM2 TPST…
GTPase activator activity	EGF STARD8 GAPVD1 SPATA13 ADPRH PREB RIN2 RIN3 NGEF TBC1D9B RGPD1 USP6NL NPRL2 STXBP5 NPRL3 MYCBP2 RGPD8 RGPD3 RGPD2 RGPD5 RGPD4 PREX2 HERC2 RACGAP1 PREX1 PLCE1 RABGAP1L TBC1D8B STARD13 IQSEC2 NCKAP1L RAB3IP ARFGAP2 ARFGAP3 CCDC88C ARFGAP1 BCR CCDC88A MON1A RGL2 RGL1 C9ORF72 ITSN1 WDR41 HACD3 RCBTB2 ABR RINL RCC1 RALGPS1 GARNL3 JUN GRTP1 RAB3IL1 GMIP VAV1 VAV2 MTSS2 VAV3 SERGEF ARHGEF4 RAPGEF2 AR…	GO_Molecular_Function_2021

## Sheet: macrophages
Table S3. Signature related gene sets used in macrophages analysis.
Signature names	Genes	References
M1	IL12A IL23A TNF IL6 CD86 HLA-DMA HLA-DMB HLA-DOA HLA-DOB HLA-DPA1 HLA-DPB1 HLA-DQA1 HLA-DQA2 HLA-DQB1 HLA-DQB2 HLA-DRA HLA-DRB1 HLA-DRB5 IL1B MARCO NOS2 FCGR1A CD80 CXCL9 CXCL10 CXCL11 CD86 IL1A IL1B IL6 TNF CCL5 IRF5 IRF1 CD40 IDO1 KYNU CCR7 PTPRC CD68 CSF1R LY75 CD14	Nat Commun. 2023 Feb 13;14(1):797.
M2	ARG1 ARG2 IL10 FCGR2A CD163 FCER2 CD200R1 PDCD1LG2 CD274 MARCO CSF1R MRC1 IL1RN IL1R2 IL4R CCL4 CCL13 CCL20 CCL17 CCL18 CCL22 CCL24 LYVE1 VEGFA VEGFB VEGFC VEGFD EGF CTSA CTSB CST3 CTSD TGFB1 TGFB2 TGFB3 MMP14 MMP19 MMP9 CLEC7A WNT7B FASLG TNFSF12 TNFSF8 CD276 VTCN1 MSR1 FN1 IRF4 PTPRC CD68 CSF1R HLA-DRA HLA-DRB1 HLA-DRB5 LY75 CD14
Angiogenesis	CCND2 CCNE1 CD44 CXCR4 E2F3 EDN1 EZH2 FGF18 FGFR1 FYN HEY1 ITGAV JAG1 JAG2 MMP9 NOTCH1 PDGFA PTK2 SPP1 STC1 TNFAIP6 TYMP VAV2 VCAN VEGFA
Proinflammatory	CSF1R CX3CR1 NOS2 TNF IL1B IL6	Gut. 2023 Jan;72(1):153-167.
Phagocytosis	MRC1 CD163 MERTK C1QB
T cell-suppressive	IDO1 CD274 PDCD1LG2 TNFSF10 HLA-E HLA-G VTCN1 IL10 TGFB1 TGFB2 PTGS2 PTGES LGALS9 CCL22 CD80 CD86	Nat Commun. 2021 Feb 2;12(1):741.
T cell-attracting	CCL21 CCL17 CCL2 CXCL9 CXCL10 CXCL11 CXCL12 CCL3 CCL4 CCL5 CXCL16

## Sheet: T cells
Table S4. Signature related gene sets used in T cells analysis.
Signature names	Genes	References
CD8T_exaust_score	LAG3 CTLA4 PDCD1 HAVCR2 TOX ICOS TNFRSF4 TIGIT	J Immunother Cancer. 2022 Dec;10(12):e005293.
Proliferation	ZWINT E2F1 FEN1 FOXM1 H2AZ1 HMGB2 MCM2 MCM3 MCM4 MCM5 MCM6 MKI67 MYBL2 PCNA PLK1 CCND1 AURKA BUB1 TOP2A TYMS DEK CCNB1 CCNE149	Nat Commun. 2021 Feb 2;12(1):741.
Cytotoxicity	GZMA GZMB GZMM NKG7 GNLY PRF1 IFNG GNLY CST7 TNFSF10	Nat Commun. 2022 Nov 25;13(1):7250.
Resident	RUNX3 NR4A1 CD69 CXCR6 NR4A3
Costimulatory	ICOS CD226 TNFRSF14 TNFRSF25 TNFRSF9 CD28
Exhausted progenitors	XCL1 MS4A4C ID3 CXCL10 SLAMF6 TCF7 IL7R TNFSF8 CTLA2A RPS20 LTB CD9 RPL36A SOCS3 RPL35 RPS2 RPS19 JUN RPS17 GPR183 RPLP0 RPL13 TRAF1 RPL31 ITGB1 MT-CYTB RPS18 RPL10-PS3 RPL12 GM8730 RPS28 EMB RPL21 RPS29 RPS26 RPSA RPS7 GM10073 MT-CO3	Nat Commun. 2022 Nov 25;13(1):7250.
Tumor_specific_T score	ENTPD1 ITGAE PDCD1 CXCL13 MAF ZBED2	Gut. 2023 Jun;72(6):1196-1210.
