# Supplementary material
Source: Research Square preprint supplement (doi:10.21203/rs.3.rs-9365545/v1)
Supplement: Supplementary file 6 [file f44f4a763751f936040532ac.xlsx]

## Sheet: Primer
Table S5. Primer sequences used for quantitative PCR (qPCR)
Gene	Primer Sequence (Forward)	Primer Sequence (Reverse)
IL4I1	GCCAAGACCCCTTCGAGAAAT	CCGATCCTGTTATCTGCCTCC
ACTB	CATGTACGTTGCTATCCAGGC	CTCCTTAATGTCACGCACGAT
CXCL13	GCTTGAGGTGTAGATGTGTCC	CCCACGGGGCAAGATTTGAA
CD82	TGTCCTGCAAACCTCCTCCA	CCATGAGCATAGTGACTGCCC
LGALS9	TCTGGGACTATTCAAGGAGGTC	CCACTGGAGCTGAGAACGG
PDCD1	CCAGGATGGTTCTTAGACTCCC	TTTAGCACGAAGCTCTCCGAT
TIGIT	TCTGCATCTATCACACCTACCC	CCACCACGATGACTGCTGT
