# Supplementary material
Source: Research Square preprint supplement (doi:10.21203/rs.3.rs-9365545/v1)

**
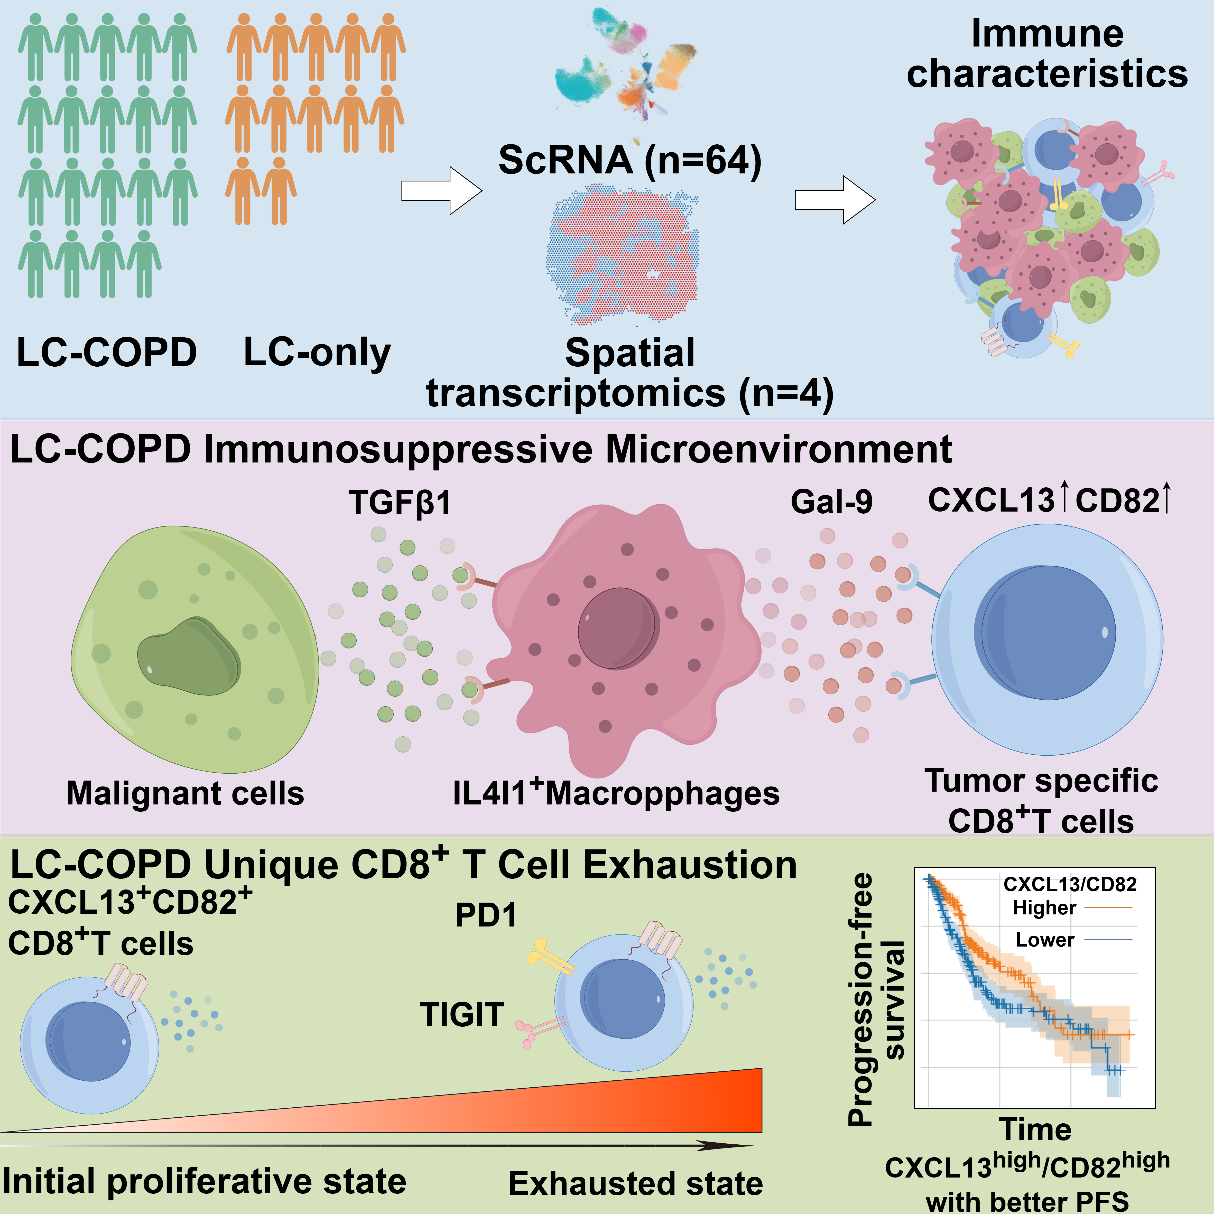
Graph abstract**

Supplement: Supplementary file 1 [file 66f646dca91047b2961a7bbf.docx]
